# Supplementary material for: Initial litter chemistry and seasonality drive potentially toxic element cycling during decomposition in a subtropical forest: insights from monospecific and mixed litter
Source: Royal Society of Chemistry journal article supplement (doi:10.1039/d5em00248f), 2025-01-01
Supplement: d5em00248f1.pdf [file d5em00248f1.pdf]

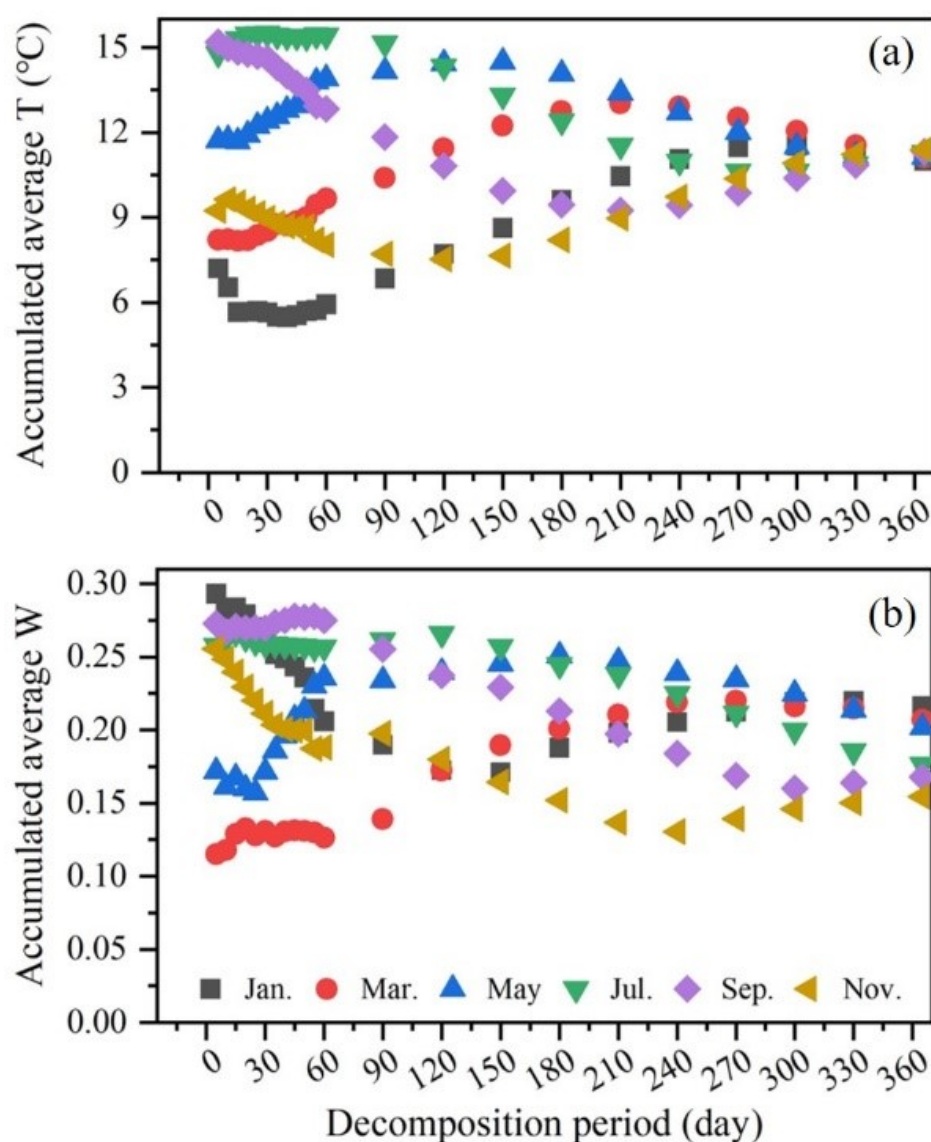

**Fig. S1.** The accumulated average soil temperature (a) and water content (b) at different starting periods within a year in a subtropical evergreen broad-leaved forest in Ailao Mountains National Nature Reserve ([Liu et al. 2023](#)).

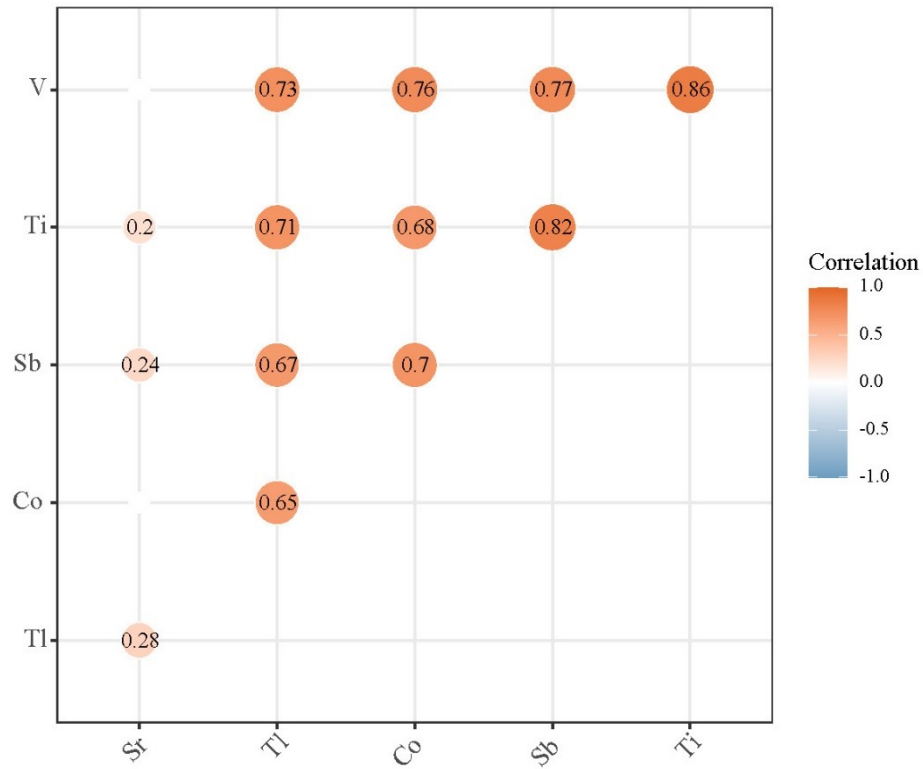

**Fig. S2.** Correlations of the AIs between the six PTEs in litters of four species and their mixture using a Spearman correlation analysis. The level of significant difference was at  $p < 0.05$ . The numbers in the figure are the correlation coefficients.
